# Supplementary material for: Preparation of nanocellulose-based nitrogen-doped carbon aerogel electrocatalysts through hydrothermal pretreatment for zinc–air batteries
Source: Royal Society of Chemistry journal article supplement (doi:10.1039/d4nj00219a), 2024-01-01
Supplement: d4nj00219a1.pdf [file d4nj00219a1.pdf]

## Supporting Information

### **Preparation of nanocellulose-based nitrogen-doped carbon aerogel electrocatalysts through hydrothermal pretreatment for Zinc-air batteries**

Yujia Wei<sup>#</sup>, Yongfa Huang<sup>#</sup>, Yike Pi, Wu Yang<sup>\*</sup>, Liping Wu, Yuling Luo, Zehong Chen, Yongkang Chen, Ge Shi, Xiao Chi<sup>\*</sup> and Xinwen Peng<sup>\*</sup>

*State Key Laboratory of Pulp and Paper Engineering, School of Light Industry and Engineering, South China University of Technology, Guangzhou 510640, China*

---

**\*Corresponding author:** E-mail address: [yangw5@scut.edu.cn](mailto:yangw5@scut.edu.cn) (W. Yang); [chixiao@scut.edu.cn](mailto:chixiao@scut.edu.cn) (X. Chi); [fexwpeng@scut.edu.cn](mailto:fexwpeng@scut.edu.cn) (X. Peng).

<sup>#</sup> These two authors contributed equally to this work.

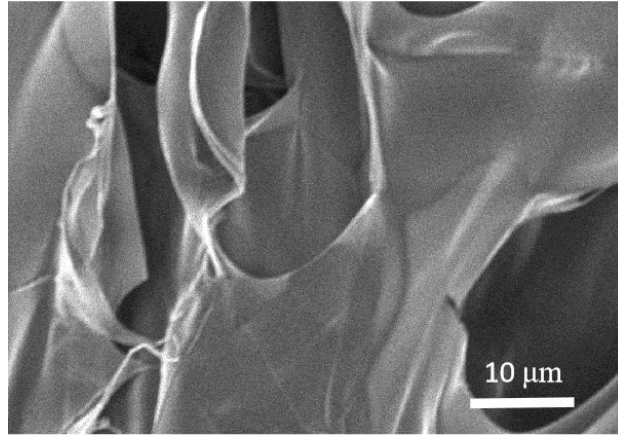

**Figure S1.** SEM image of g-C<sub>3</sub>N<sub>4</sub>.

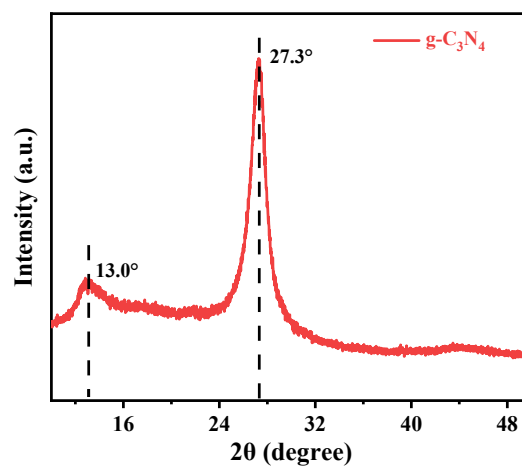

**Figure S2.** XRD spectrum of g-C<sub>3</sub>N<sub>4</sub>.

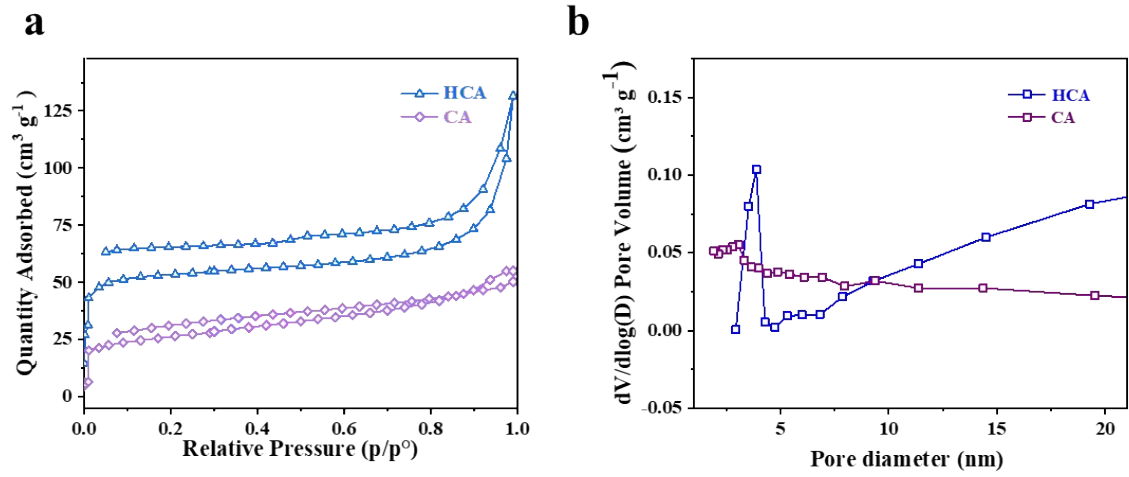

**Figure S3** (a)  $N_2$  adsorption and desorption isotherms of HCA and CA. (b) The BJH pore size distributions of HCA and CA.

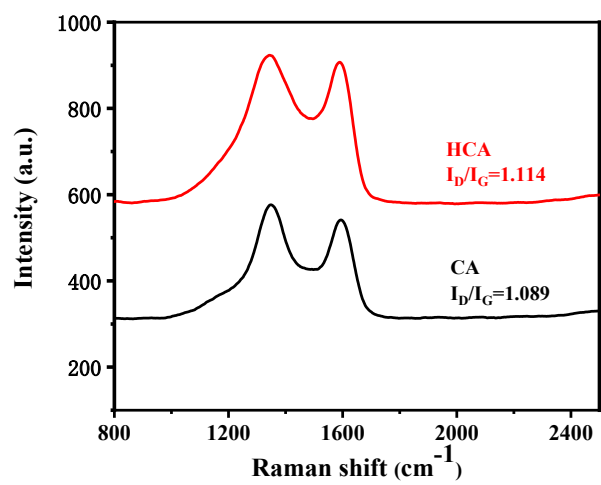

**Figure S4.** Raman spectra of HCA and CA.

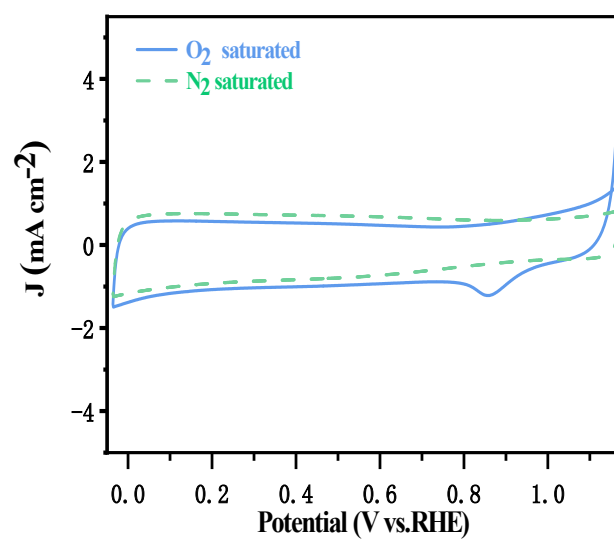

**Figure S5.** CV curves of HNCA in  $\text{N}_2$ -saturated and  $\text{O}_2$ -saturated 0.1 M KOH aqueous solution.

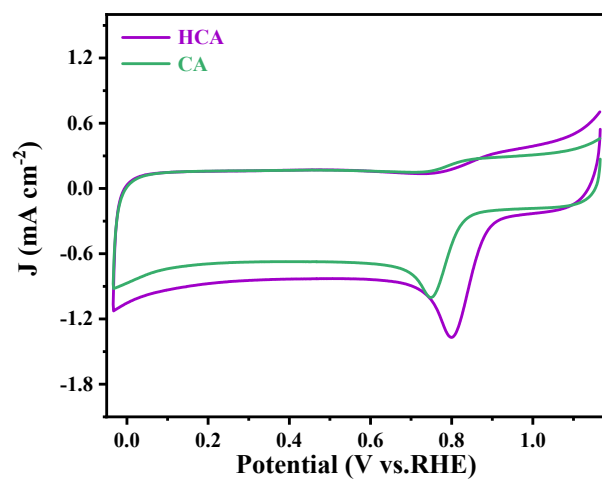

**Figure S6.** CV patterns in O<sub>2</sub>-saturated 0.1 M KOH aqueous solution of HCA and CA.

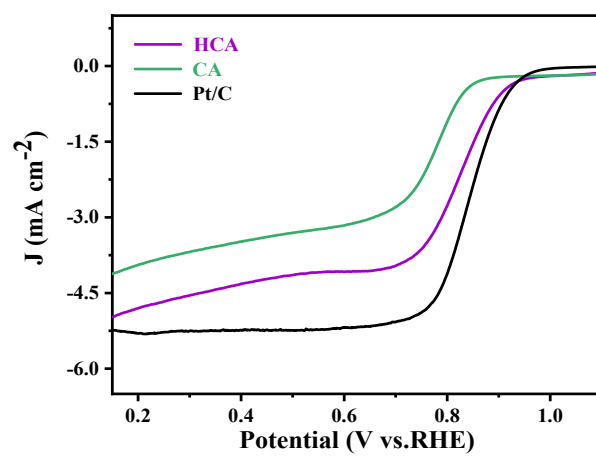

**Figure S7.** LSV curves of HCA and CA in an O<sub>2</sub>-saturated electrolyte at 1,600 rpm, compared with commercial Pt/C catalyst.



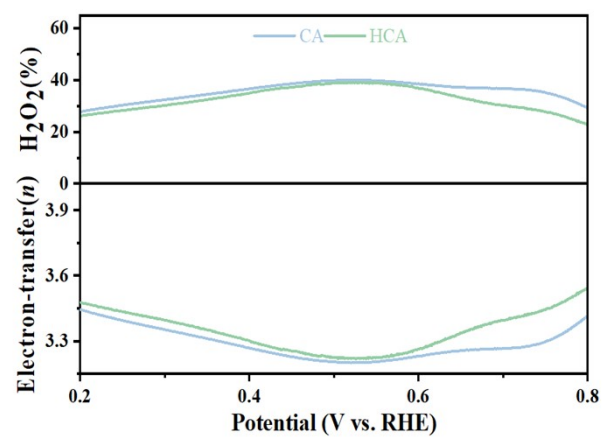

**Figure S8.** The peroxide yield and the electron transfer number of CA and HCA.

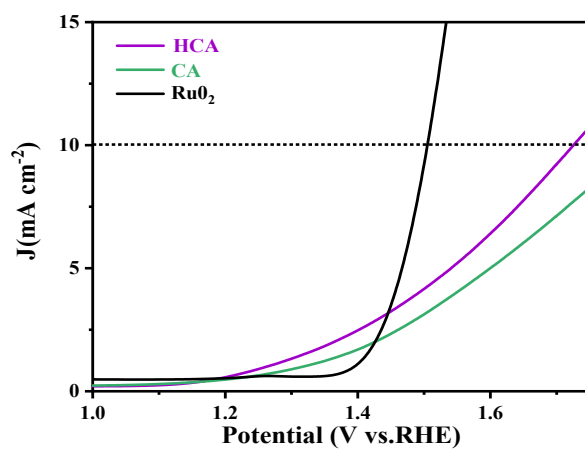

**Figure S9.** LSV curves for OER, compared with commercial RuO<sub>2</sub>.

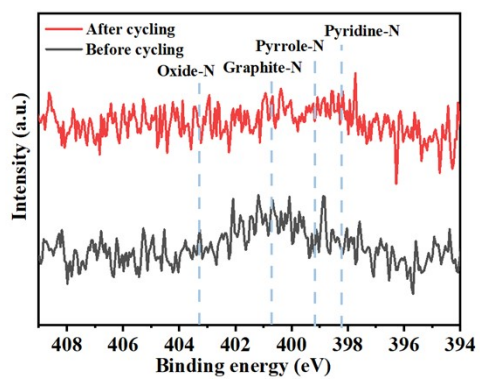

**Figure S10.** N1s spectra before and after long-duration ZAB test.

**Table S1.** The specific surface area and element content of different samples.

| Samples | BET surface<br>area (m <sup>2</sup> g <sup>-1</sup> ) | Element content (atom%) |       |      |
|---------|-------------------------------------------------------|-------------------------|-------|------|
|         |                                                       | N                       | C     | O    |
| HNCA    | 785.4                                                 | 3.28                    | 90.07 | 6.65 |
| NCA     | 493.3                                                 | 3.39                    | 88.97 | 7.64 |
| HCA     | 206.3                                                 | 0.97                    | 89.44 | 9.59 |
| CA      | 103.6                                                 | 0.63                    | 90.75 | 8.62 |
